# Supplementary material for: A highly sensitive enzymeless glucose sensor based on 3D graphene–Cu hybrid electrodes
Source: Royal Society of Chemistry journal article supplement (doi:10.1039/c5nj01512j), 2015-01-01
Supplement: c5nj01512j1.pdf [file c5nj01512j1.pdf]

Electronic Supporting Information

## **Highly Sensitive Enzymeless Glucose Sensor Based on 3D Graphene-Cu Hybrid Electrodes**

Sajjad Hussain<sup>a,b</sup>, Kamran Akbar<sup>c</sup>, Dhanasekaran Vikraman<sup>a,b</sup>, Dong-Chul Choi<sup>a,b</sup>, Seong Jun Kim<sup>d</sup>, Ki-Seok An<sup>d</sup>, Seunho Jung<sup>c</sup>, and Jongwan Jung<sup>\*a,b</sup>,

<sup>a</sup> *Graphene Research Institute, Sejong University, Seoul 143-747, Republic of Korea.*

<sup>b</sup> *Institute of Nano and Advanced Materials Engineering, Sejong University, Seoul 143-747, Republic of Korea.*

<sup>c</sup> *Center for Biotechnology Research in UBITA (CBRU), Dept. of Bioscience and Biotechnology, Konkuk University, Seoul 143-701, Republic of Korea.*

<sup>d</sup> *Thin Film Materials Research Center, Korea Research Institute of Chemical Technology, Daejeon 305-600, Korea*

\*Corresponding author E-mail: [jwjung@sejong.ac.kr](mailto:jwjung@sejong.ac.kr) (Prof. Jongwan Jung)

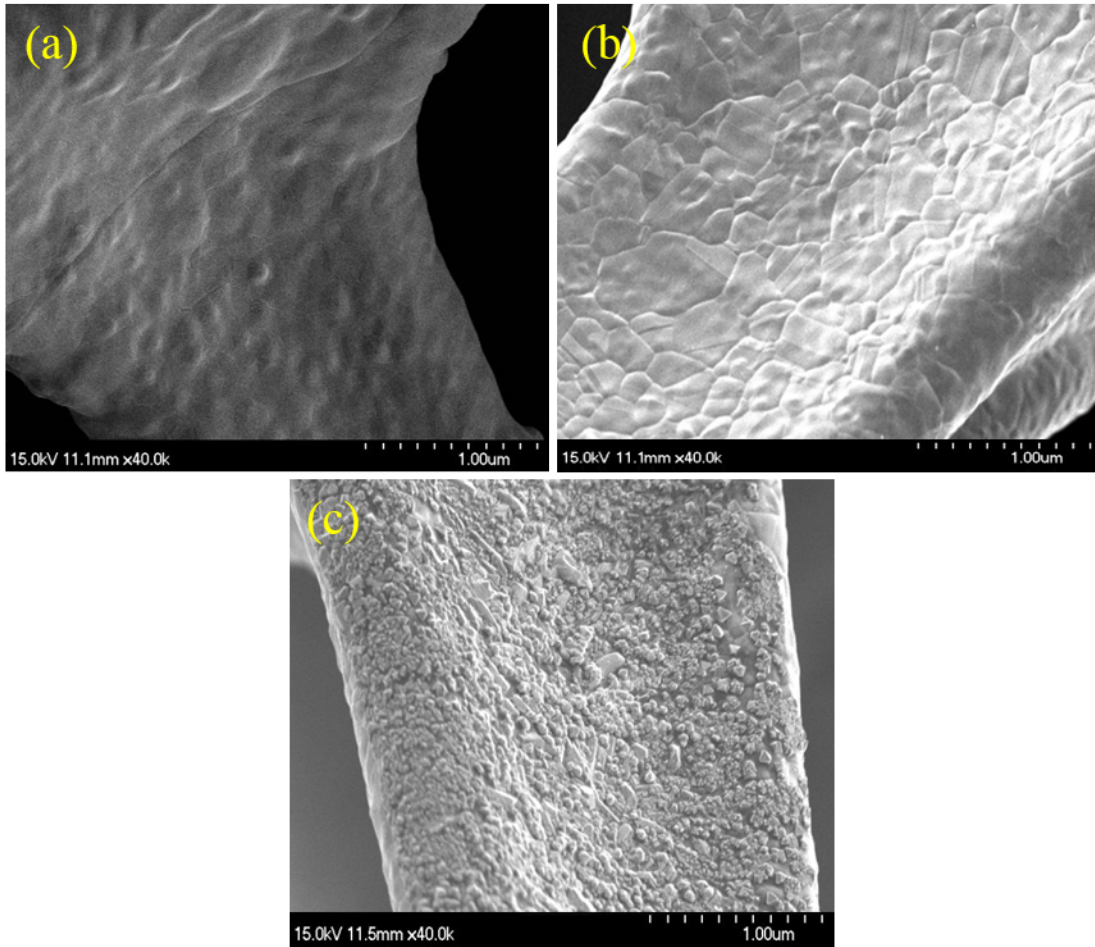

Fig. S1. Higher magnification FESEM micrographs for (a) Ni foam substrate, (b) 3D graphene/Ni foam and (c) Cu/3D graphene surface.

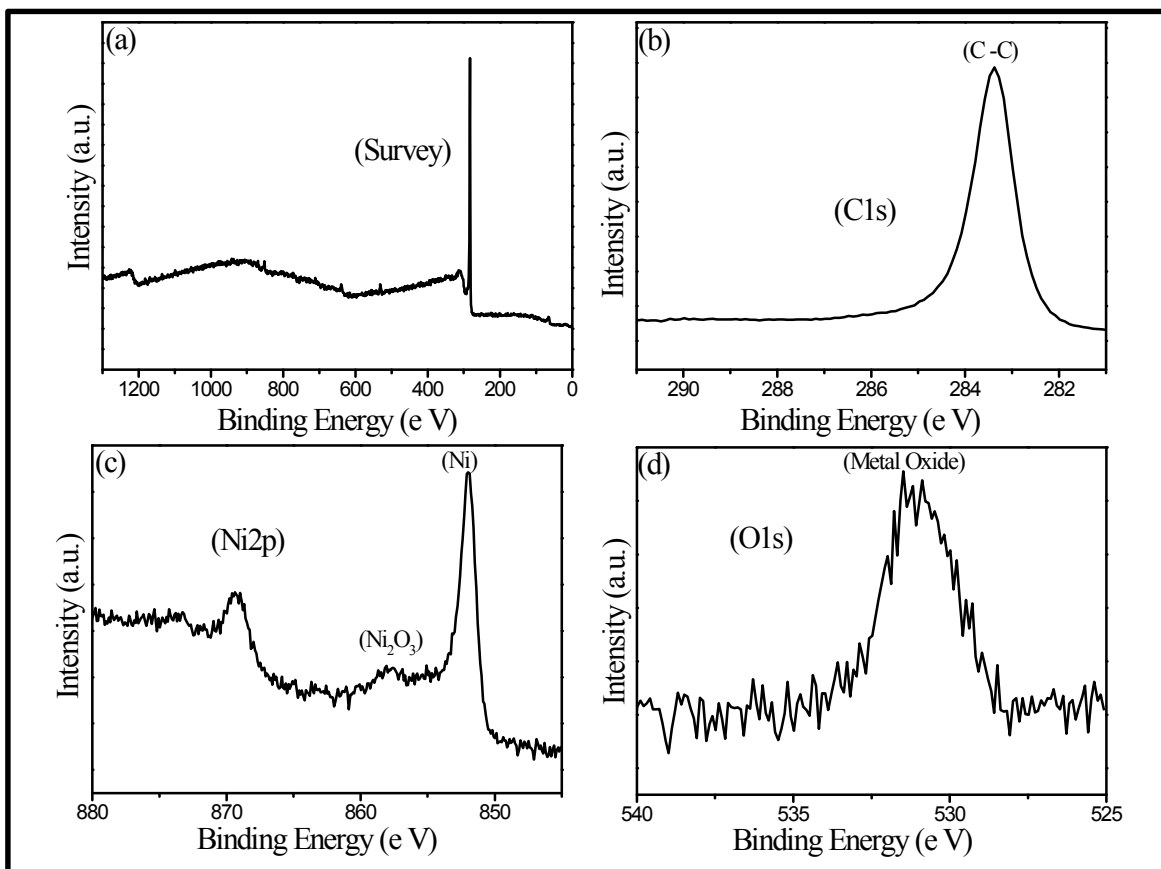

Fig. S2. XPS of CVD prepared graphene on Ni Foam (a) complete survey. (b) High-resolution XPS scan for the C1s core level peak. (c) XPS peak for Ni<sub>2p</sub> peak from the substrate. (d) High-resolution XPS scan for the O1s core level peak.

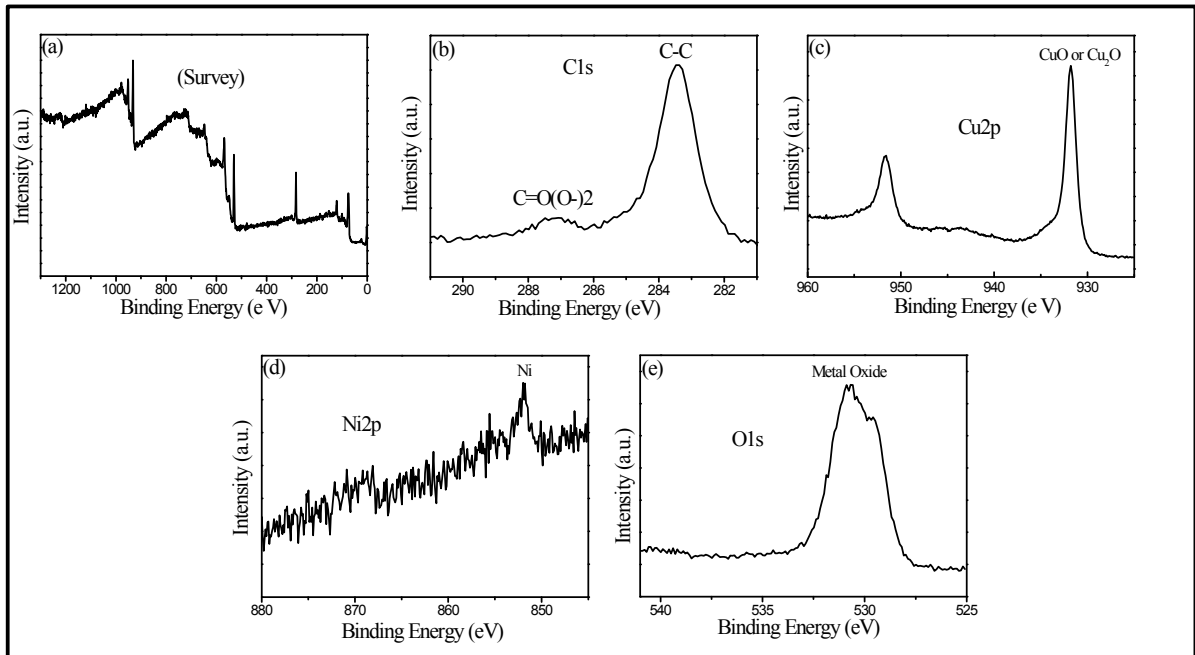

Fig. S3. XPS for Cu/3D graphene/Ni foam (a) General survey. (b) High-resolution XPS scan for the C 1s core level peak of Cu/3D graphene/Ni. (c) High-resolution XPS scan for Cu 2p core level peak which is originated from the Cu layer. (d) XPS Ni<sub>2p</sub> core level peak originated from substrate. (e) XPS scan for the O 1s core level peak.

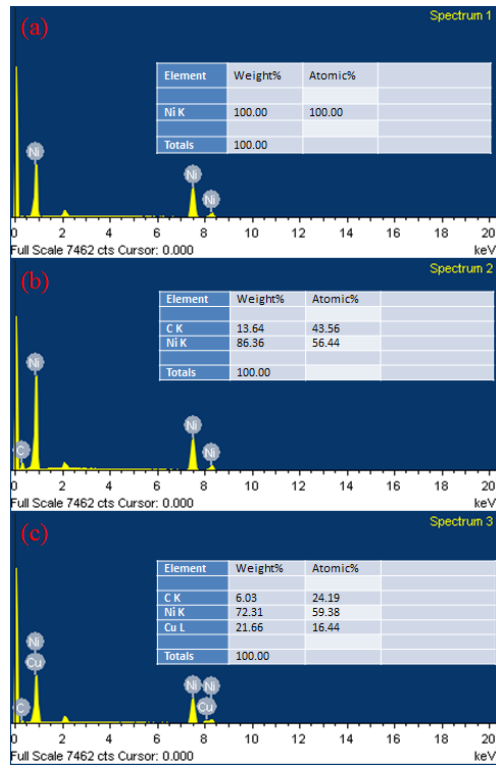

Fig. S4. EDX analysis spectra for (a) Ni foam substrate (b) 3D Graphene deposited Ni foam and (c) Cu/3D graphene surface.

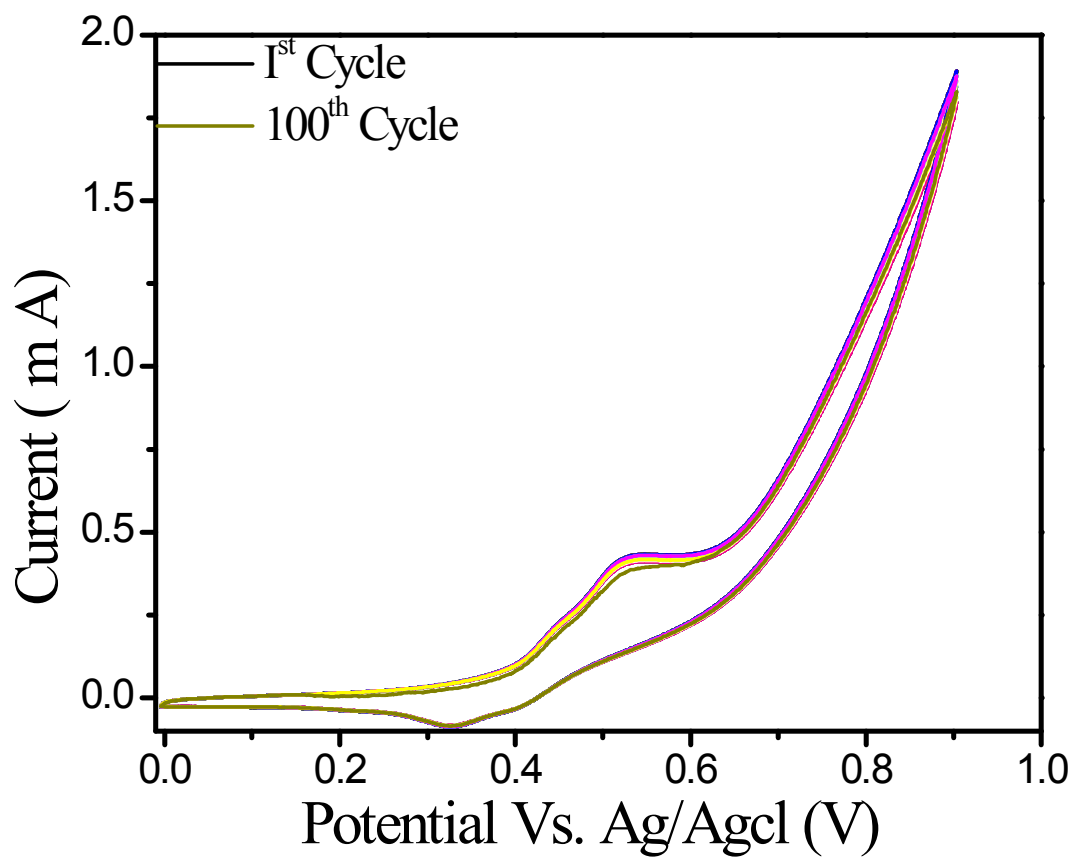

Fig. S5. Multiple cycle CV curves for Cu/3D graphene/NF hybrid.
